# Supplementary material for: A new approach for pyrene bioremediation using bacteria immobilized in layer-by-layer assembled microcapsules: dynamics of soil bacterial community
Source: Royal Society of Chemistry journal article supplement (doi:10.1039/c5ra23273b), 2016-01-01
Supplement: c5ra23273b1.pdf [file c5ra23273b1.pdf]

## Supporting Information

A new approach for pyrene bioremediation using bacteria immobilized in  
layer-by-layer assembly microcapsules: Dynamics of soil bacterial  
community

Fucai Deng<sup>a</sup>, Changjun Liao<sup>a,b</sup>, Chen Yang<sup>a,c\*</sup>, Chuling Guo<sup>a,c</sup>, Lin Ma<sup>a</sup>, Zhi Dang<sup>a,c\*</sup>

<sup>a</sup> College of Environment and Energy, South China University of Technology, Guangzhou,  
510006, China

<sup>b</sup> Department of Environmental Engineering, Guangdong Vocational College of  
Environmental Protection Engineering, Foshan, 528216, China

<sup>c</sup> The Key Laboratory of Pollution Control and Ecosystem Restoration in Industry Clusters,  
Ministry of Education, China

\*Correspondence: Dr. Chen Yang & Dr. Zhi Dang, College of Environment and Energy,  
South China University of Technology, Guangzhou, China; Phone: (+86)-020-87110198, E-  
mail: [cyanggz@scut.edu.cn](mailto:cyanggz@scut.edu.cn) & [chzdang@scut.edu.cn](mailto:chzdang@scut.edu.cn)

## 20 Standard protocol of biological slices preparation for TEM analysis

21 The TEM specimens of *P. putida* cells were prepared by the following procedures. The  
22 native and treated cells were quickly fixed in the mixture solution (4% of paraformaldehyde  
23 and 2.5% of glutaraldehyde) for 12 h at 4 °C. Followed by washing three times, the samples  
24 were postfixed with 1% osmium tetroxide in 0.05M sodium cacodylate buffer for 2 h. After  
25 fixation, the samples were concentrated by centrifugation at 6000 rpm for 2 min and washed  
26 twice with PBS buffer. The concentrated cells were dehydrated with sequential treatment  
27 with 30, 50, 70, 80, 90, and 100% ethanol for 10 min. The cells were then infiltrated and  
28 embedded in Spurr's resin with propylene oxide (treatment with 3:1, 2:1, 1:1, 1:2, and 1:3 of  
29 propylene oxide/Spurr's resin mixtures for 30min each, and 100% Spurr's resin for 25 h).  
30 The samples, filled with Spurr's resin, were cured overnight at 70 °C to form sample blocks.  
31 The polymerized blocks were sectioned using an ultramicrotome (MT-X, RMC), and the thin  
32 sections were stained in 2% uranyl acetate and lead citrate, and examined by TEM at 100 kV  
33 accelerating potential.

35 **Figure S1**

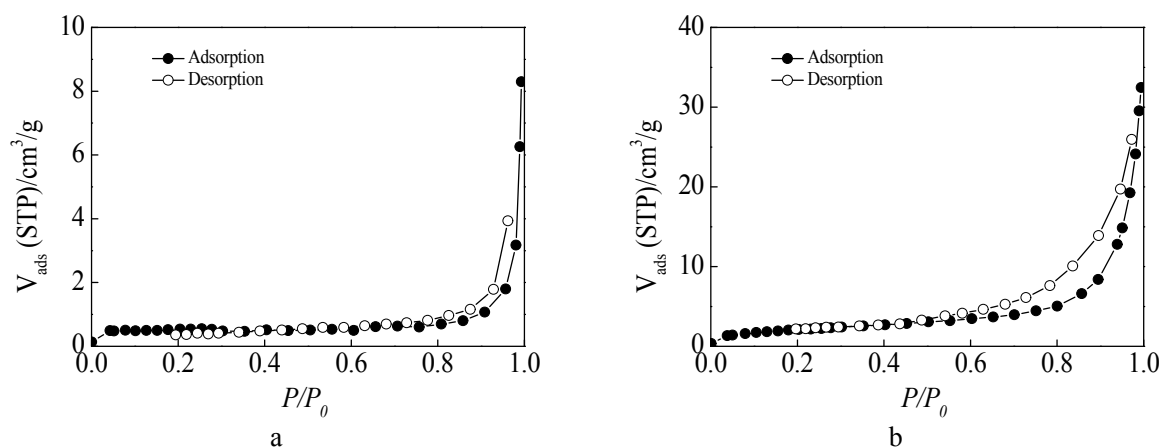

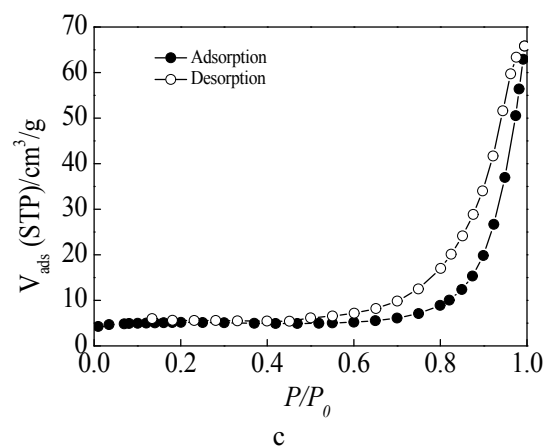

36 Figure S1  $N_2$  adsorption - desorption isotherms of the  $\text{CaCO}_3$  template (a), LBL microcapsule with (b), and  
 37 without (c)  $\text{CaCO}_3$  template.  
 38
